# Supplementary material
Source: PubMed Central journal article supplement (PMC11148888)
Supplement: sj-pdf-1-jfm-10.1177_1098612X15571878.pdf [file sj-pdf-1-jfm-10.1177_1098612X15571878.pdf]

**Table 1** Phenotypic traits of the domestic cat conferred by DNA variants

| Locus (Alleles)<br>OMIA entry link                                                                   | MOI*     | Phenotype                                          | Gene          | Gene name                               | Mutation                                                                |
|------------------------------------------------------------------------------------------------------|----------|----------------------------------------------------|---------------|-----------------------------------------|-------------------------------------------------------------------------|
| <a href="#">Agouti (A<sup>+</sup>, a)<sup>5</sup><br/>000201-9685</a>                                | AR       | <b>Banded fur to solid</b>                         | <i>ASIP</i>   | <i>Agouti-signaling protein</i>         | c.122_123delCA                                                          |
| <a href="#">Brown (B<sup>+</sup>, b, b)<sup>6,7</sup><br/>001249-9685</a>                            | AR       | <b>Brown, light brown color variants</b>           | <i>TYRP1</i>  | <i>Tyrosinase-related protein</i>       | b = -5IVS6<br>b <sup>l</sup> = c.298C>T                                 |
| <a href="#">Color (C<sup>+</sup>, C<sup>b</sup>, C<sup>s</sup>, c)<sup>7-9</sup><br/>000202-9685</a> | AR       | <b>Burmese, Siamese color pattern, full albino</b> | <i>TYR</i>    | <i>Tyrosinase</i>                       | c <sup>b</sup> = c.715G>T<br>c <sup>s</sup> = c.940G>A<br>c = c.975delC |
| <a href="#">Dilution (D<sup>+</sup>, d)<sup>10</sup><br/>000206-9685</a>                             | AR       | <b>Black to grey/blue, orange to cream</b>         | <i>MLPH</i>   | <i>Melanophilin</i>                     | c.83delT                                                                |
| <a href="#">Dwarfism<br/>000299-9685</a>                                                             | AD       | <b>Shortening of long bones</b>                    | unknown       | unknown                                 | unknown                                                                 |
| <a href="#">Extension (E<sup>+</sup>, e) – Amber<sup>11</sup><br/>001199-9685</a>                    | AR       | <b>Brown/red color variant</b>                     | <i>MC1R</i>   | <i>Melanocortin receptor 1</i>          | c.250G>A                                                                |
| <a href="#">Fold (Fd, fd<sup>+</sup>)<br/>000319-9685</a>                                            | AD       | <b>Ventral ear fold</b>                            | unpublished   | unpublished                             | unpublished                                                             |
| <a href="#">Gloves (G<sup>+</sup>, g)<sup>12</sup><br/>001580-9685</a>                               | AR       | <b>White feet</b>                                  | <i>KIT</i>    | <i>KIT</i>                              | c.1035_1036delinsCA                                                     |
| <a href="#">Hairless (Hr<sup>+</sup>, hr)<sup>13</sup></a>                                           | AR       | <b>Atrichia</b>                                    | <i>KRT71</i>  | <i>Keratin 71</i>                       | c.816+1G>A                                                              |
| <a href="#">Inhibitor (I, i<sup>+</sup>)<br/>001584-9685</a>                                         | AD       | <b>Absence of pheomelanin</b>                      | unknown       | unknown                                 | unknown                                                                 |
| <a href="#">Japanese Bobtail (J, j<sup>+</sup>)</a>                                                  | AD       | <b>Kinked tail</b>                                 | unknown       | unknown                                 | unknown                                                                 |
| <a href="#">Kurl (K, k<sup>+</sup>)<br/>000244-9685</a>                                              | AD       | <b>Rostral curled pinnae</b>                       | unknown       | unknown                                 | unknown                                                                 |
| <a href="#">LaPerm<br/>000245-9685</a>                                                               | AD       | <b>Curly hair coat</b>                             | unknown       | unknown                                 | unknown                                                                 |
| <a href="#">Longhair (L<sup>+</sup>, l)<sup>14,15</sup><br/>000439-9685</a>                          | AR       | <b>Long fur</b>                                    | <i>FGF5</i>   | <i>Fibroblast growth factor 5</i>       | c.356_367insT<br>c.406C>T<br>c.474delT<br>c.475A>C                      |
| <a href="#">Tailless (Manx) (M, m<sup>+</sup>)<sup>16</sup><br/>000975-9685</a>                      | AD       | <b>Absent/short tail</b>                           | <i>TBOX</i>   | <i>T-box</i>                            | c.998delT<br>c.1169delC<br>c.1199delC<br>c.998_1014dup17delGCC          |
| <a href="#">Orange (O, o<sup>+</sup>)<br/>001201-9685</a>                                            | X-linked | <b>Change in pigment hue</b>                       | unknown       | unknown                                 | unknown                                                                 |
| <a href="#">Peterbald<br/>001866-9685</a>                                                            | AD       | <b>Hairless, brush coat</b>                        | unknown       | unknown                                 | unknown                                                                 |
| <a href="#">Polydactyla (Pd, pd<sup>+</sup>)<sup>17</sup><br/>000810-9685</a>                        | AD       | <b>Extra toes</b>                                  | <i>SHH</i>    | <i>Sonic hedgehog</i>                   | c.479A>G<br>c.257G>C<br>c.481A>T                                        |
| <a href="#">Rexing (R<sup>+</sup>, r)<sup>18</sup><br/>001684-9685</a>                               | AR       | <b>Curly hair coat</b>                             | <i>LPAR6</i>  | <i>Lysophosphatidic acid receptor 6</i> | c.250_253delTTTG                                                        |
| <a href="#">Rexing (Re<sup>+</sup>, re)<sup>13</sup><br/>001581-9685</a>                             | AR       | <b>Curly hair coat</b>                             | <i>KRT71</i>  | <i>Keratin 71</i>                       | c.1108-4_1184del,<br>c.1184_1185insAGTTGGAG<br>c.1196insT               |
| <a href="#">Rexing (R<sup>S</sup>, r<sup>s+</sup>)<sup>19</sup><br/>001712-9685</a>                  | AD       | <b>Curly hair coat</b>                             | <i>KRT71</i>  | <i>Keratin 71</i>                       | c.445-1G>C                                                              |
| <a href="#">Spotting (S, s<sup>+</sup>)<sup>20</sup><br/>000214-9685</a>                             | Co-D     | <b>Bicolor/Van white</b>                           | <i>KIT</i>    | <i>KIT</i>                              | 7125ins FERV1 element                                                   |
| <a href="#">Tabby (T<sup>M</sup>, t<sup>b</sup>)<sup>21</sup><br/>001429-9685</a>                    | AR       | <b>Blotched/classic pattern</b>                    | <i>TAQPEP</i> | <i>Transmembrane aminopeptidase Q</i>   | c.176C>A<br>c.416C>A<br>c.682C>A<br>c.2522G>A                           |
| <a href="#">Ticked (T<sup>i</sup>, ti)<br/>001484-9685</a>                                           | AD       | <b>No tabby pattern</b>                            | unknown       | unknown                                 | unknown                                                                 |
| <a href="#">White (W, w<sup>+</sup>)<sup>20</sup><br/>000209-9685</a>                                | AD       | <b>Loss of pigmentation</b>                        | <i>KIT</i>    | <i>KIT</i>                              | FERV1 LTR ins                                                           |
| <a href="#">Wide-band</a>                                                                            | AR?      | <b>Length of pheomelanin band in hair</b>          | unknown       | unknown                                 | unknown                                                                 |

\*Mode of inheritance of the non-wild type variant. '+' implies the wild type allele when known. In reference to the mutant allele, AD = autosomal dominant, AR = autosomal recessive, co-D = co-dominant.

OMIA: Online Mendelian Inheritance in Animals (omia.angis.org.au) entries provide links to citations and clinical descriptions of the phenotypes and the diseases. Listed citations are for the causative variant discovery
