# Supplementary material
Source: PubMed Central journal article supplement (PMC11148888)
Supplement: sj-pdf-2-jfm-10.1177_1098612X15571878.pdf [file sj-pdf-2-jfm-10.1177_1098612X15571878.pdf]

**Table 2** Inherited diseases of domestic cats for which a commercial DNA test is available

| Disease/trait (Alleles)<br>OMIA entry link                                             | MOI* | Phenotype                    | Gene              | Gene name                                                         | Mutation                                           |
|----------------------------------------------------------------------------------------|------|------------------------------|-------------------|-------------------------------------------------------------------|----------------------------------------------------|
| <b>AB blood type</b> (A <sup>+</sup> , b) <sup>71</sup><br><a href="#">000119-9685</a> | AR   | Determines type B            | <i>CMAH</i>       | <i>Cytidine monophospho-N-acetylneuraminic acid hydroxylase</i>   | c.1del-53_70<br>c.139G>A                           |
| <b>Craniofacial defect</b>                                                             | AR   | Craniofacial defect          | unpublished       | unpublished                                                       | unpublished                                        |
| <b>Gangliosidosis 1</b> <sup>72</sup><br><a href="#">000402-9685</a>                   | AR   | Lipid storage disorder (GM1) | <i>GLB1</i>       | <i>Galactosidase, beta 1</i>                                      | c.1457G>C                                          |
| <b>Gangliosidosis 2</b> <sup>69,73</sup><br><a href="#">01462-0985</a>                 | AR   | Lipid storage disorder (GM2) | <i>HEXB</i>       | <i>Hexaminidase B</i>                                             | c.1356del-1_8<br>c.1356_1362delGTTCTCA<br>c.39delC |
| <b>Glycogen storage disease IV</b> <sup>74</sup><br><a href="#">000420-9685</a>        | AR   | Glycogen storage disorder    | <i>GBE1</i>       | <i>Glycogen branching enzyme 1</i>                                | IVS11+1552_IVS12-1339<br>del6.2kb ins334 bp        |
| <b>Hypertrophic cardiomyopathy</b> <sup>75,76</sup><br><a href="#">000515-9685</a>     | AD   | Cardiac disease (HCM)        | <i>MYBPC</i>      | <i>Myosin binding protein C</i>                                   | c.93G>C<br>c.2460C>T                               |
| <b>Hypokalemia</b> <sup>77</sup><br><a href="#">001759-9685</a>                        | AR   | Potassium deficiency (HK)    | <i>WNK4</i>       | <i>WNK lysine deficient protein kinase 4</i>                      | c.2899C>T                                          |
| <b>Progressive retinal atrophy</b> <sup>78</sup><br><a href="#">001244-9685</a>        | AR   | Late-onset blindness (rdAC)  | <i>CEP290</i>     | <i>Centrosomal protein 290kDa</i>                                 | IVS50 + 9T>G                                       |
| <b>Progressive retinal atrophy</b> <sup>79</sup><br><a href="#">000881-9685</a>        | AD   | Early-onset blindness (rdy)  | <i>CRX</i>        | <i>Cone-rod homeobox</i>                                          | c.546delC                                          |
| <b>Polycystic kidney disease</b> <sup>80</sup><br><a href="#">000807-9685</a>          | AD   | Kidney cysts (PKD)           | <i>PKD1</i>       | <i>Polycystin 1</i>                                               | c.10063C>A                                         |
| <b>Pyruvate kinase deficiency</b> <sup>81</sup><br><a href="#">000844-9685</a>         | AR   | Hemopathy (PK deficiency)    | <i>PKLR</i>       | <i>Pyruvate kinase, liver, RBC</i>                                | c.693+304G>A                                       |
| <b>Spinal muscular atrophy</b> <sup>82</sup><br><a href="#">000939-9685</a>            | AR   | Muscular atrophy (SMA)       | <i>LIX1-LNPEP</i> | <i>Limb expression 1 homolog – leucyl/cystinyl aminopeptidase</i> | Partial gene deletions                             |

\*Mode of inheritance of the non-wild type variant. Not all transcripts for a given gene may have been discovered or well documented in the cat; mutations presented as interpreted from original publication. '+' implies the wild type allele when known. In reference to the mutant allele, AD = autosomal dominant, AR = autosomal recessive. OMIA: Online Mendelian Inheritance in Animals ([omia.angis.org.au](http://omia.angis.org.au)) entries provide links to citations and clinical descriptions of the phenotypes and the diseases. Listed citations are for the causative variant discovery
