# Supplementary material
Source: PubMed Central journal article supplement (PMC11148888)
Supplement: sj-pdf-3-jfm-10.1177_1098612X15571878.pdf [file sj-pdf-3-jfm-10.1177_1098612X15571878.pdf]

**Table 5** Uncommon mutations for inherited diseases of domestic cats\*

| Disease                                                                          | OMIA entry link             | Gene           | Mutation†                                            |
|----------------------------------------------------------------------------------|-----------------------------|----------------|------------------------------------------------------|
| 11 $\beta$ -hydroxylase deficiency (congenital adrenal hypoplasia) <sup>95</sup> | <a href="#">001661-9685</a> | <i>CYP11B1</i> | Exon 7 G>A                                           |
| Dihydropyrimidinase deficiency <sup>96</sup>                                     | <a href="#">001776-9685</a> | <i>DPYS</i>    | c.1303G>A                                            |
| Factor XII deficiency <sup>97</sup>                                              | <a href="#">000364-9685</a> | <i>FXII</i>    | c.1321delC                                           |
| Fibrodysplasia ossificans progressiva                                            | <a href="#">000388-9685</a> | unpublished    | unpublished                                          |
| Gangliosidosis 1 <sup>98</sup>                                                   | <a href="#">000402-9685</a> | <i>GLB1</i>    | c.1448G>C                                            |
| Gangliosidosis 2 <sup>99,100</sup>                                               | <a href="#">001462-9685</a> | <i>HEXB</i>    | c.1467_1491inv<br>c.667C>T                           |
| Gangliosidosis 2 <sup>74</sup>                                                   | <a href="#">001427-9685</a> | <i>GM2A</i>    | c.390_393GGTC                                        |
| Hemophilia B <sup>101</sup>                                                      | <a href="#">000438-9685</a> | <i>F9</i>      | c.247G>A<br>c.1014C>T                                |
| Hyperoxaluria <sup>102</sup>                                                     | <a href="#">000821-9685</a> | <i>GRHPR</i>   | G>A I4 acceptor site                                 |
| Hypothyroidism                                                                   | <a href="#">000536-9685</a> | unpublished    | unpublished                                          |
| Lipoprotein lipase deficiency <sup>103</sup>                                     | <a href="#">001210-9685</a> | <i>LPL</i>     | c.1234G>A                                            |
| Mucopolipidosis II <sup>104</sup>                                                | <a href="#">001248-9685</a> | <i>GNPTAB</i>  | c.2655C>T                                            |
| Mannosidosis, alpha <sup>105</sup>                                               | <a href="#">000625-9685</a> | <i>LAMAN</i>   | c.1748_1751delCCAG                                   |
| Mucopolysaccharidosis I <sup>106</sup>                                           | <a href="#">000664-9685</a> | <i>IDUA</i>    | c.1107_1109delICGA<br>c.1108_1110GAC                 |
| Mucopolysaccharidosis VI <sup>94</sup>                                           | <a href="#">000666-9685</a> | <i>ARSB</i>    | c.1427T>C                                            |
| Mucopolysaccharidosis VI <sup>93,107</sup>                                       | <a href="#">000666-9685</a> | <i>ARSB</i>    | c.1558G>A                                            |
| Mucopolysaccharidosis VII <sup>108</sup>                                         | <a href="#">000667-9685</a> | <i>GUSB</i>    | c.1052A>G                                            |
| Muscular dystrophy <sup>68</sup>                                                 | <a href="#">001081-9685</a> | <i>DMD</i>     | 900bp del M promoter – exon 1                        |
| Niemann–Pick C <sup>109</sup>                                                    | <a href="#">000725-9685</a> | <i>NPC</i>     | c.2864G>C                                            |
| Polydactyly <sup>17</sup>                                                        | <a href="#">000810-9685</a> | <i>SHH</i>     | c.479A>G<br>c.257G>C<br>c.481A>T                     |
| Porphyria (congenital erythropoietic) <sup>110‡</sup>                            | <a href="#">001175-9685</a> | <i>UROS</i>    | c.140C>T<br>c.331G>A                                 |
| Porphyria (acute intermittent) <sup>111‡</sup>                                   | <a href="#">001493-9685</a> | <i>HMBS</i>    | c.842_844delGAG<br>c.189dupT<br>c.250G>A<br>c.445C>T |
| Vitamin D resistant rickets <sup>112,113</sup>                                   | <a href="#">000837-9685</a> | <i>CYP27B1</i> | c.223G>A<br>c.731delG<br>c.637G>T                    |

\*The presented conditions are not prevalent in breeds or populations but may have been established into research colonies. †Not all transcripts for a given gene may have been discovered or well documented in the cat; mutations presented as interpreted from original publication. ‡A variety of mutations have been identified, yet unpublished, for porphyrias in domestic cats. Contact PennGen at the University of Pennsylvania for additional information. OMIA: Online Mendelian Inheritance in Animals ([omia.angis.org.au](http://omia.angis.org.au)) entries provide links to citations and clinical descriptions of the phenotypes and the diseases. Listed citations are for the causative variant discovery
